# Supplementary material
Source: PubMed Central journal article supplement (PMC8939892)
Supplement: NIHMS1025141-supplement-Supplemental_Figs_and_legends.pdf [file NIHMS1025141-supplement-Supplemental_Figs_and_legends.pdf]

# Supplementary Materials

Figure S1

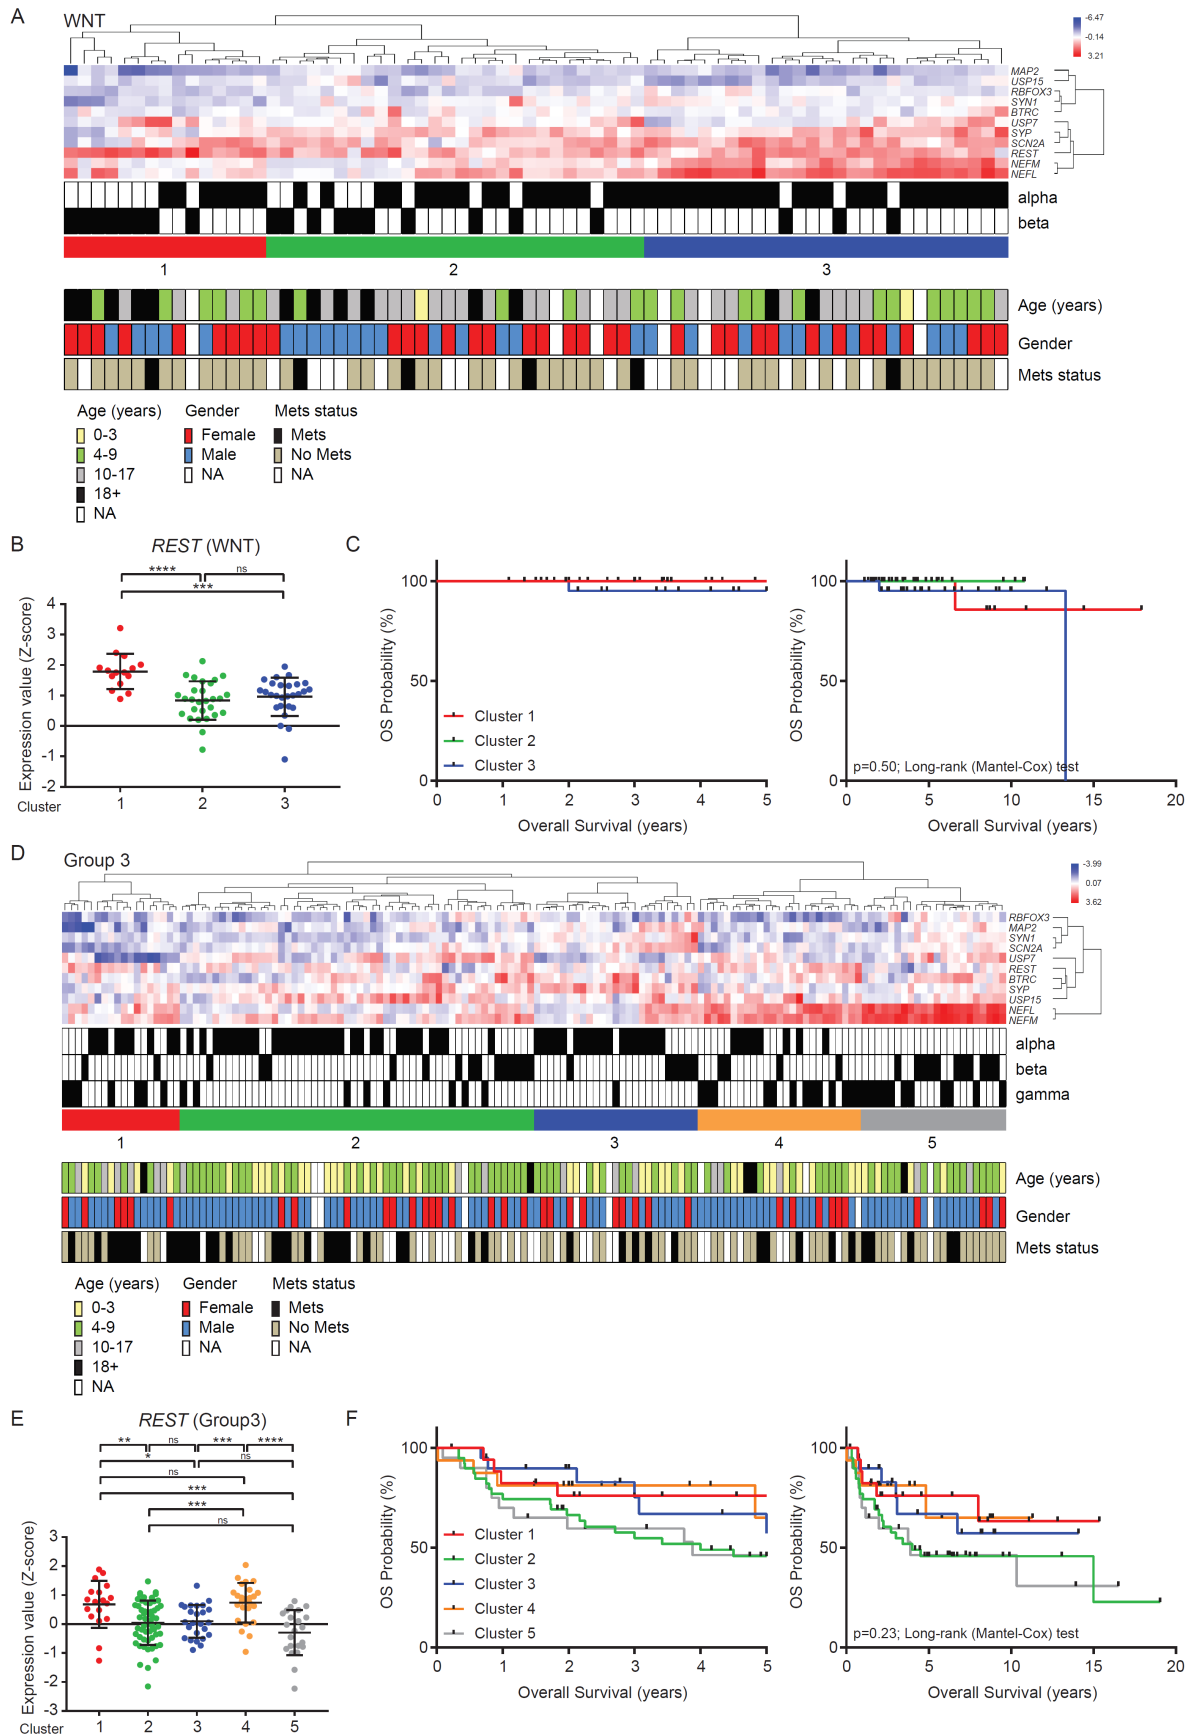

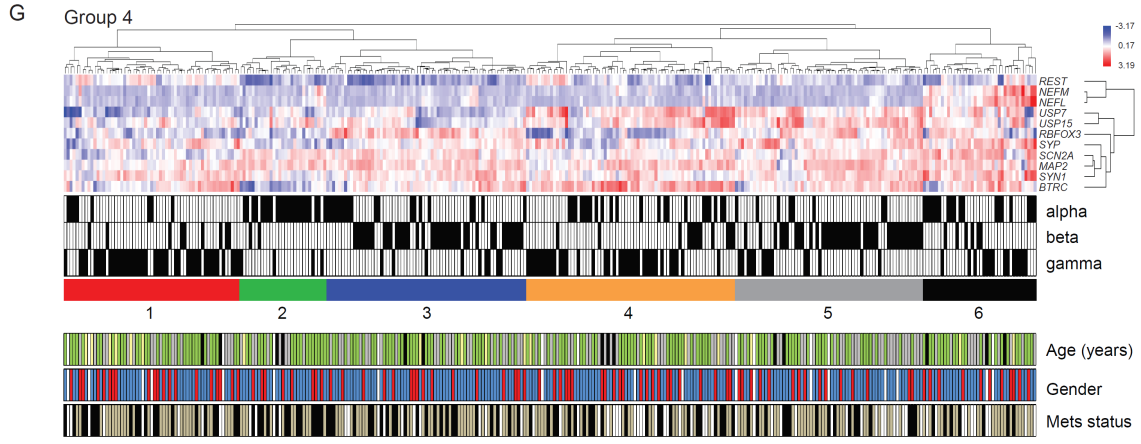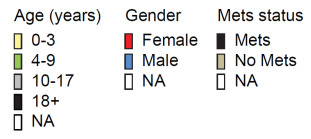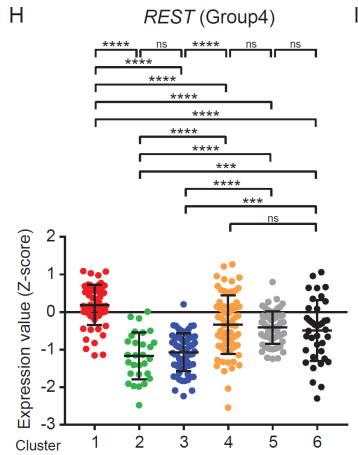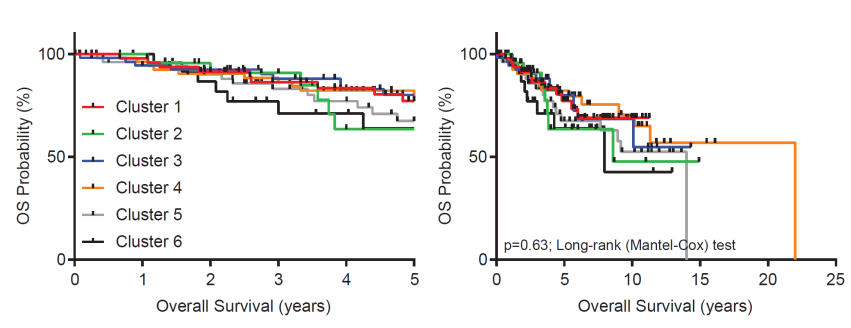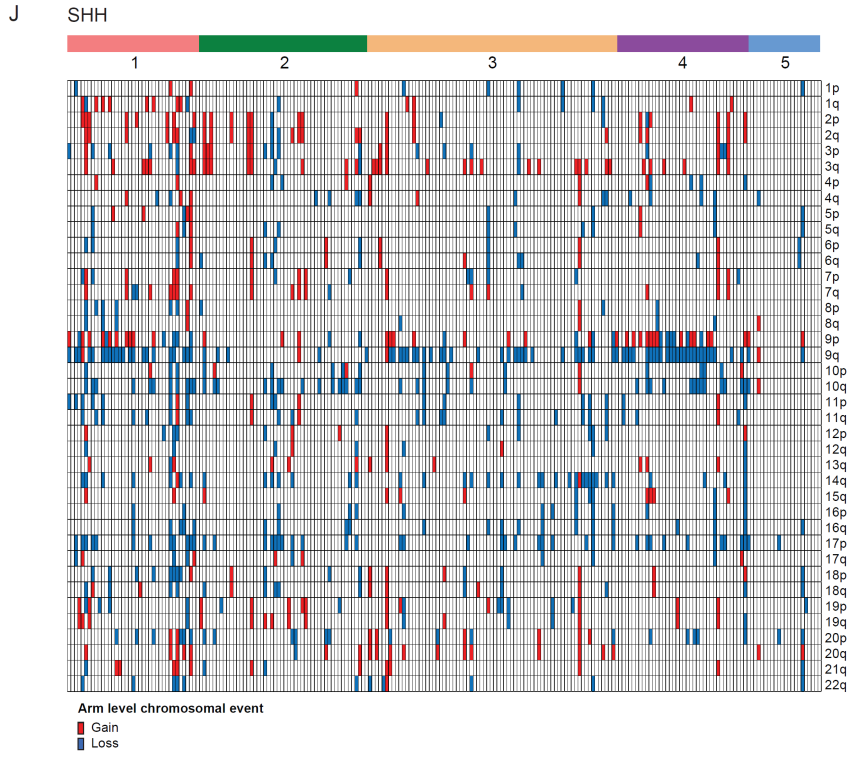

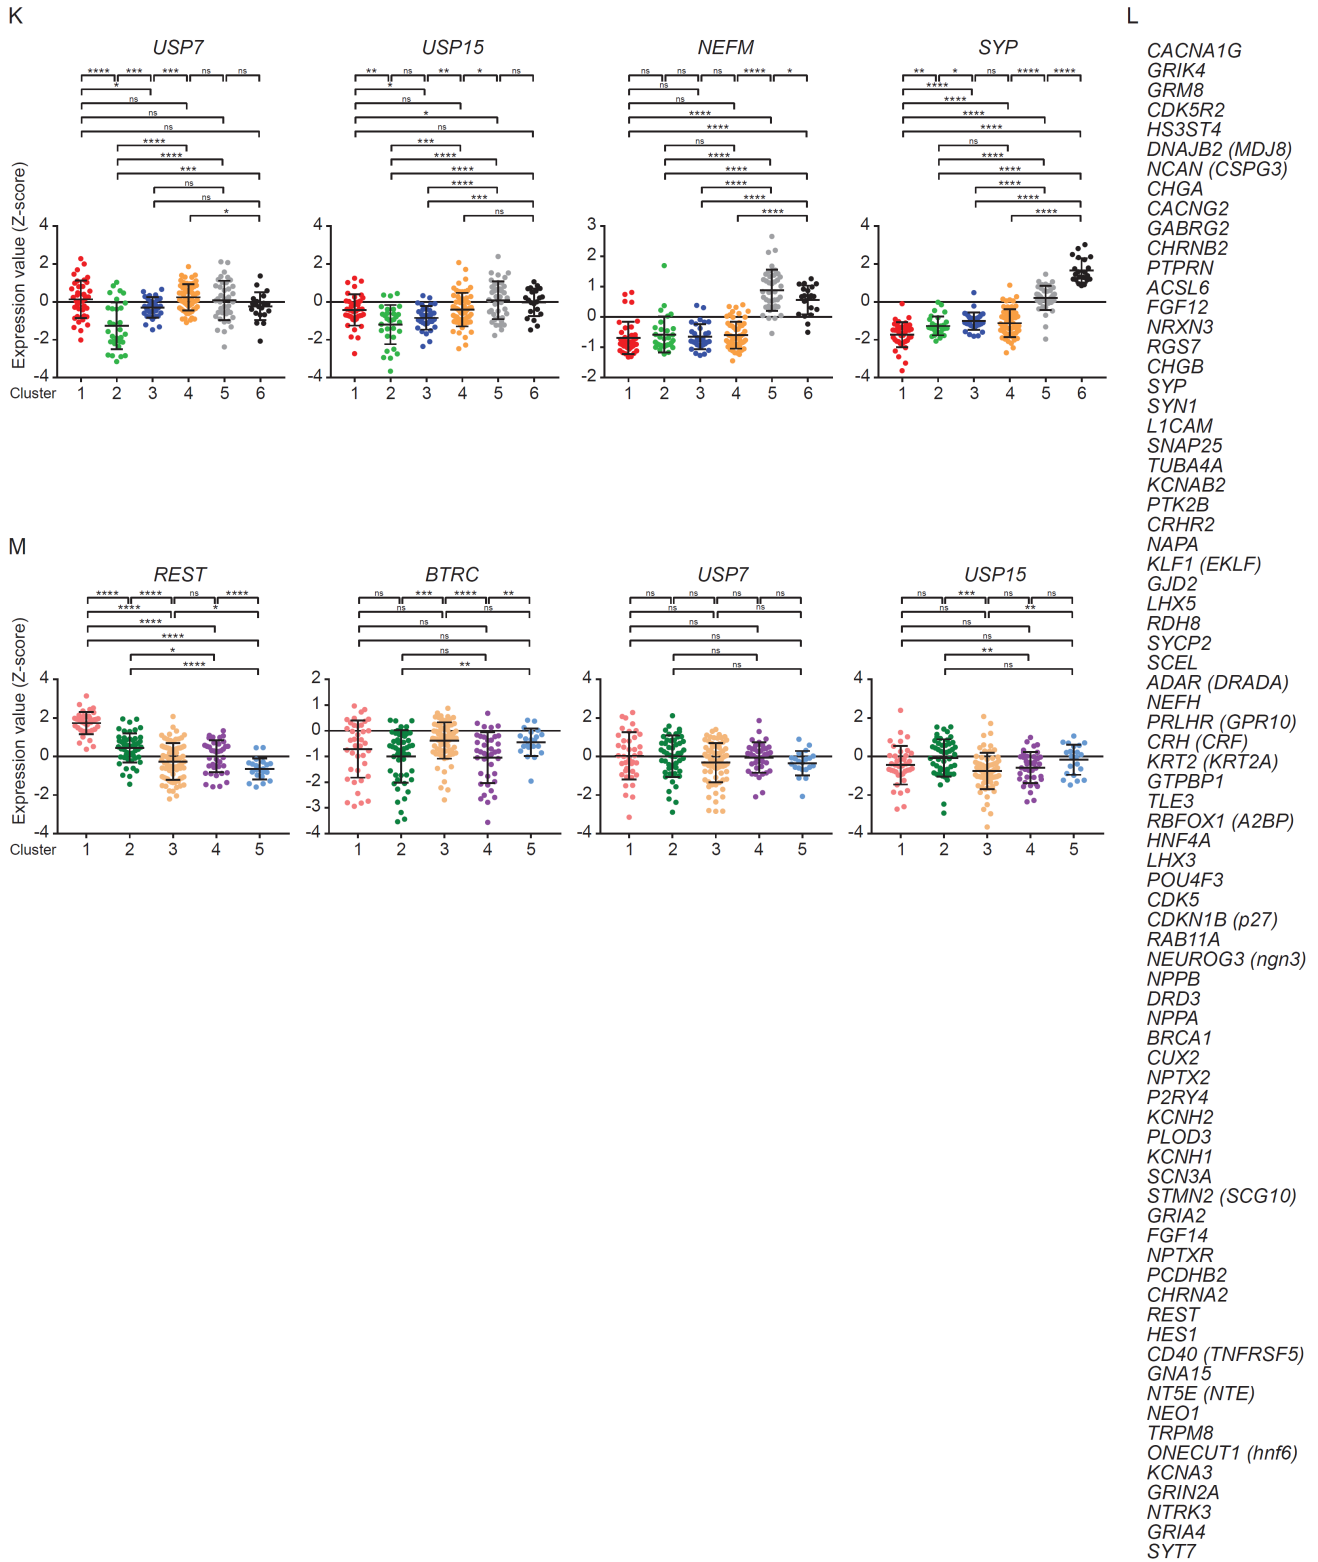

fig S1: Clinical characteristics. (A-C) Clinical characteristics based on clustering analysis of WNT MB patient samples. (D-F) Clinical characteristics based on clustering analysis of Group 3 MB patient samples. (G-I) Clinical characteristics based on clustering analysis of Group 4 MB patient

samples. (J) Arm-level chromosomal copy number change in SHH patients. Red and blue colored bars correspond to the gain and loss in the given chromosomal region, respectively. (K) Gene expression profiles measured by microarray. The patient samples were divided into six distinct clusters based on clustering assay. Each dot corresponds to one individual patient. Bars represent mean with standard deviations. \*,  $p < 0.05$ , \*\*,  $p < 0.01$ , \*\*\*,  $p < 0.001$ , \*\*\*\*,  $p < 0.0001$ , ns; non-significant. (L) Listed genes used for clustering analysis in the order of top-down pictured in Figure 1.

Figure S2

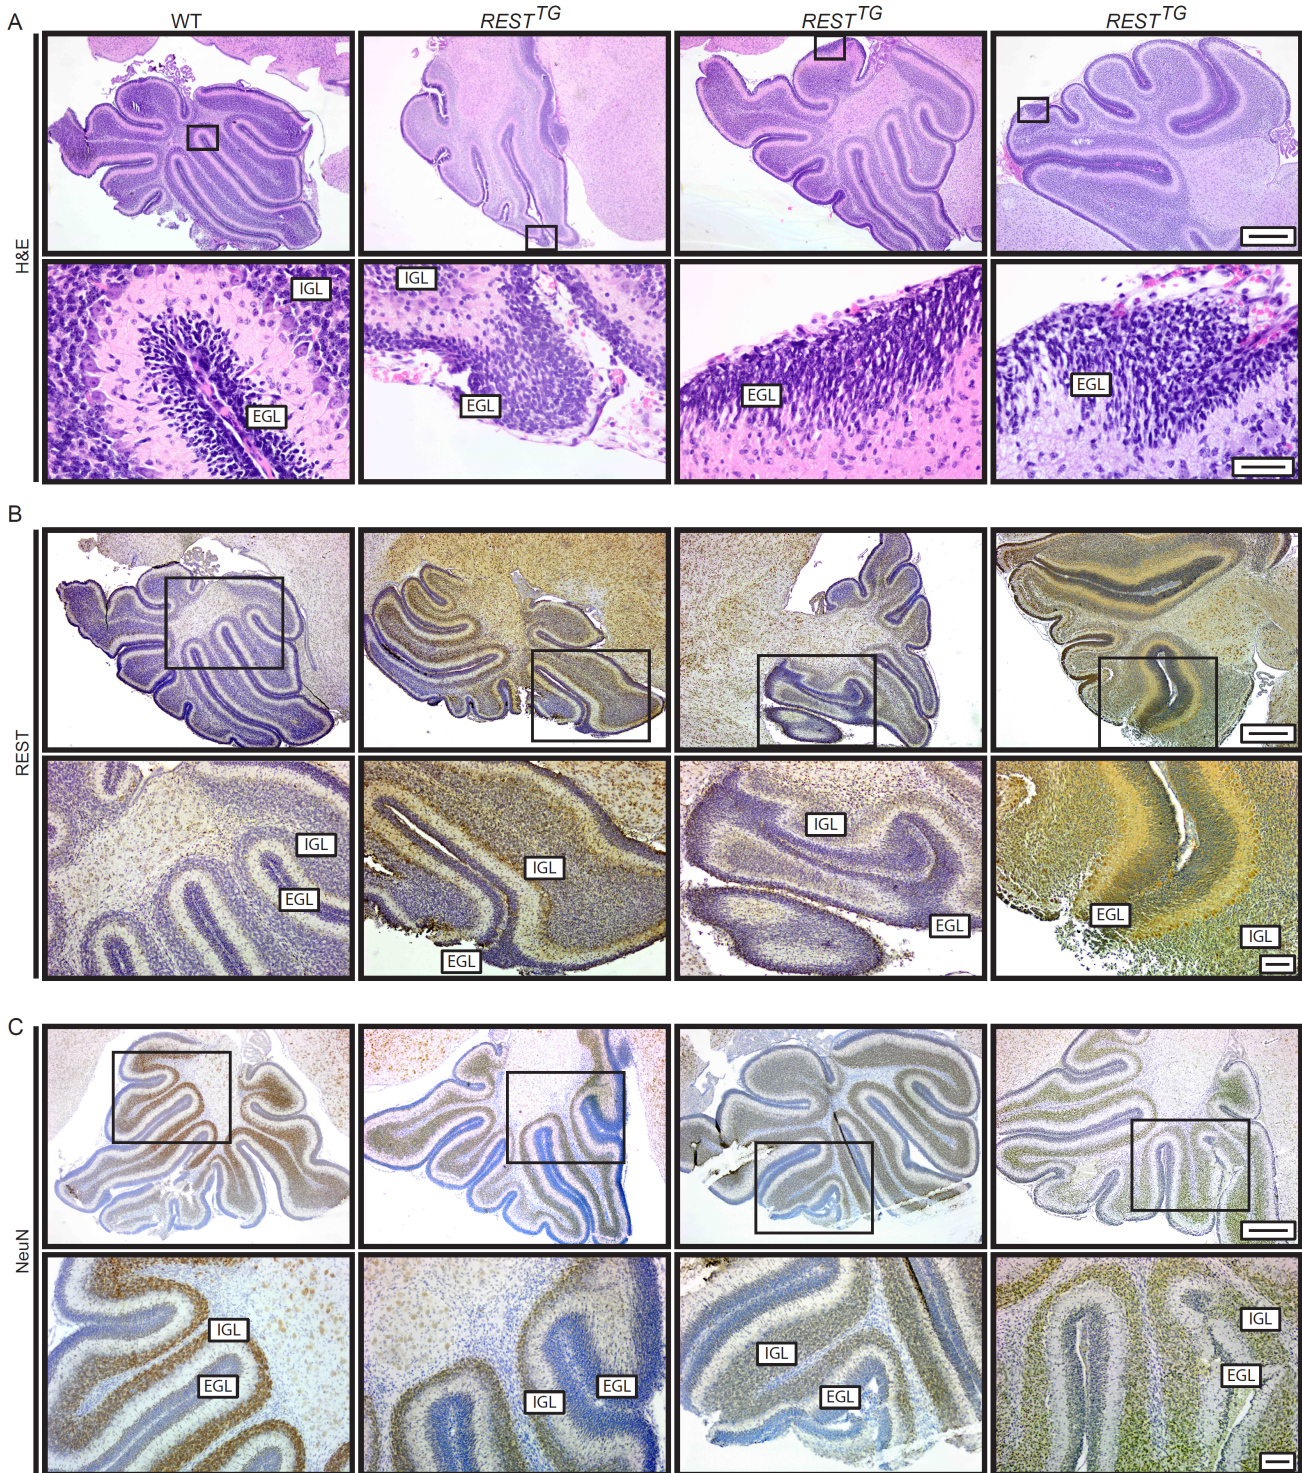

fig S2: Cerebellar architecture and protein expression in age-matched *REST*<sup>TG</sup> and WT mice. (A) WT or *REST*<sup>TG</sup> p8 brain sections stained with H&E. Sections were analyzed by IHC for (B) REST and (C) NeuN protein expression in CGNPs using specific antibodies. Scale bars = 200  $\mu$ m (top panel -4x) and 20  $\mu$ m (bottom panel -40X).

Figure S3

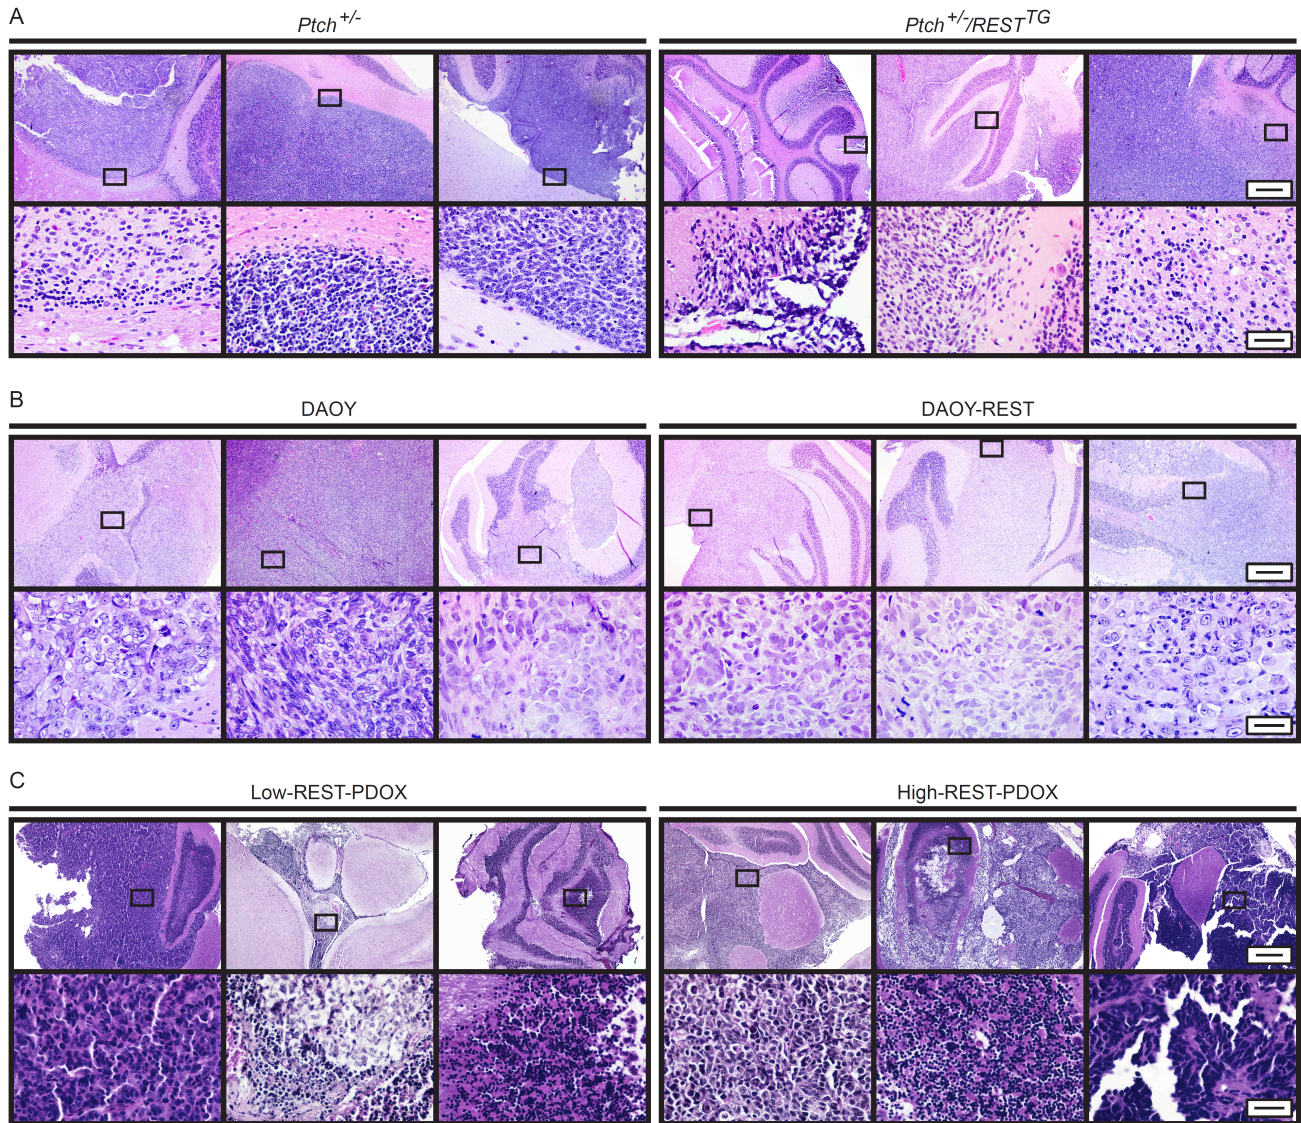

fig S3: REST elevation contributes to infiltrative Shh-driven MB development. Comparison of H&E stained brain sections from (A) *Ptch*<sup>+/-</sup> and *Ptch*<sup>+/-</sup>/*REST*<sup>TG</sup> animals with localized and infiltrative tumors, respectively (n=3), (B) DAOY and DAOY-REST xenografts (n=3), and (C) Low REST and High REST PDOXs (n=3). Scale bars = 200  $\mu$ m (top panel -4x) and 20  $\mu$ m (bottom panel - 40X).

Figure S4

A

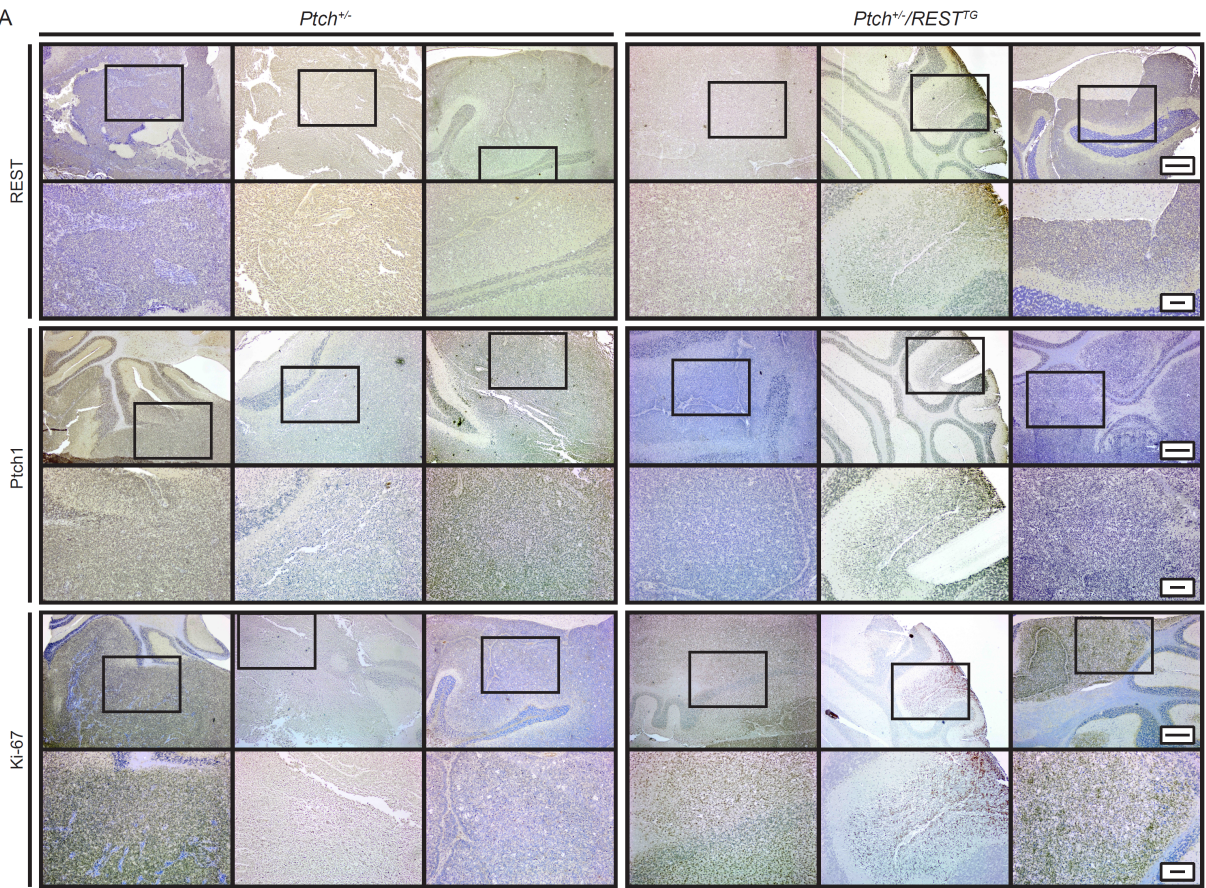

B

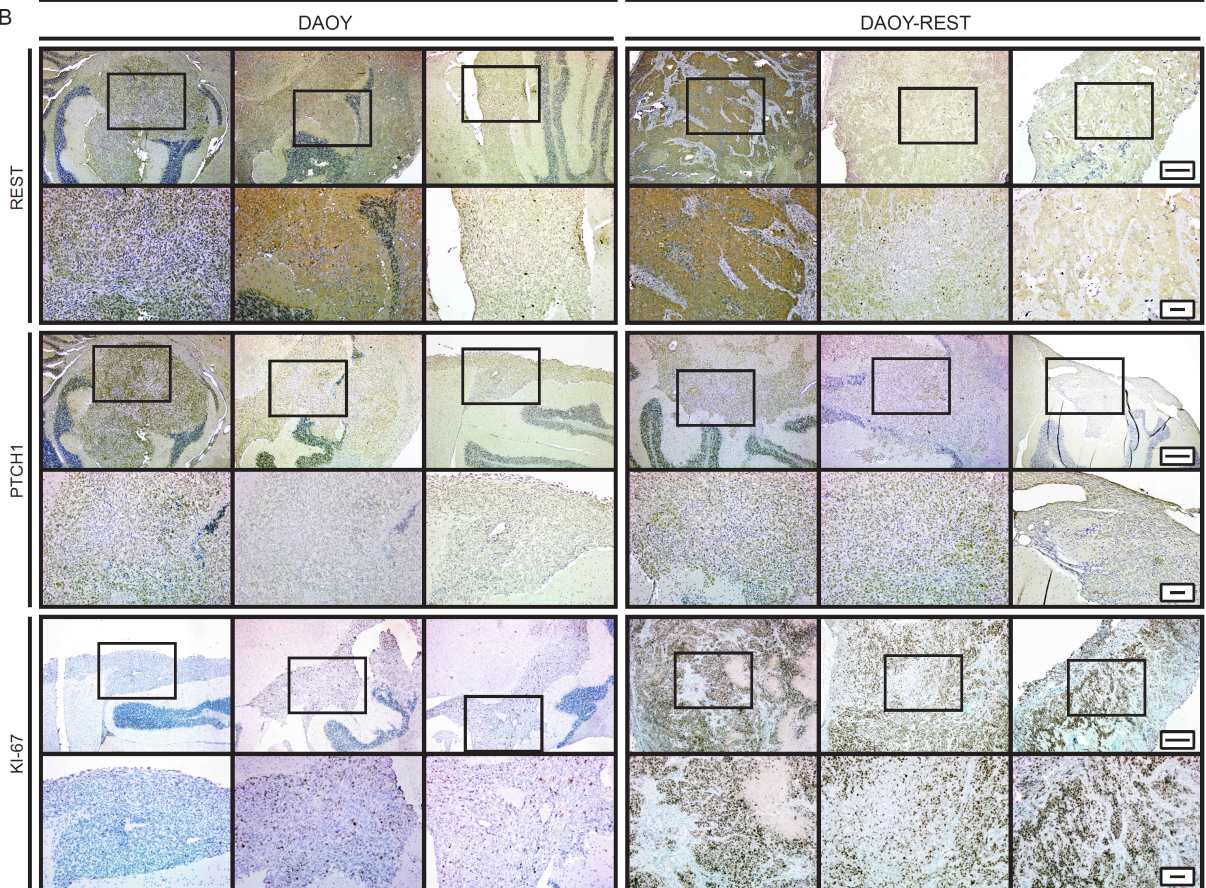

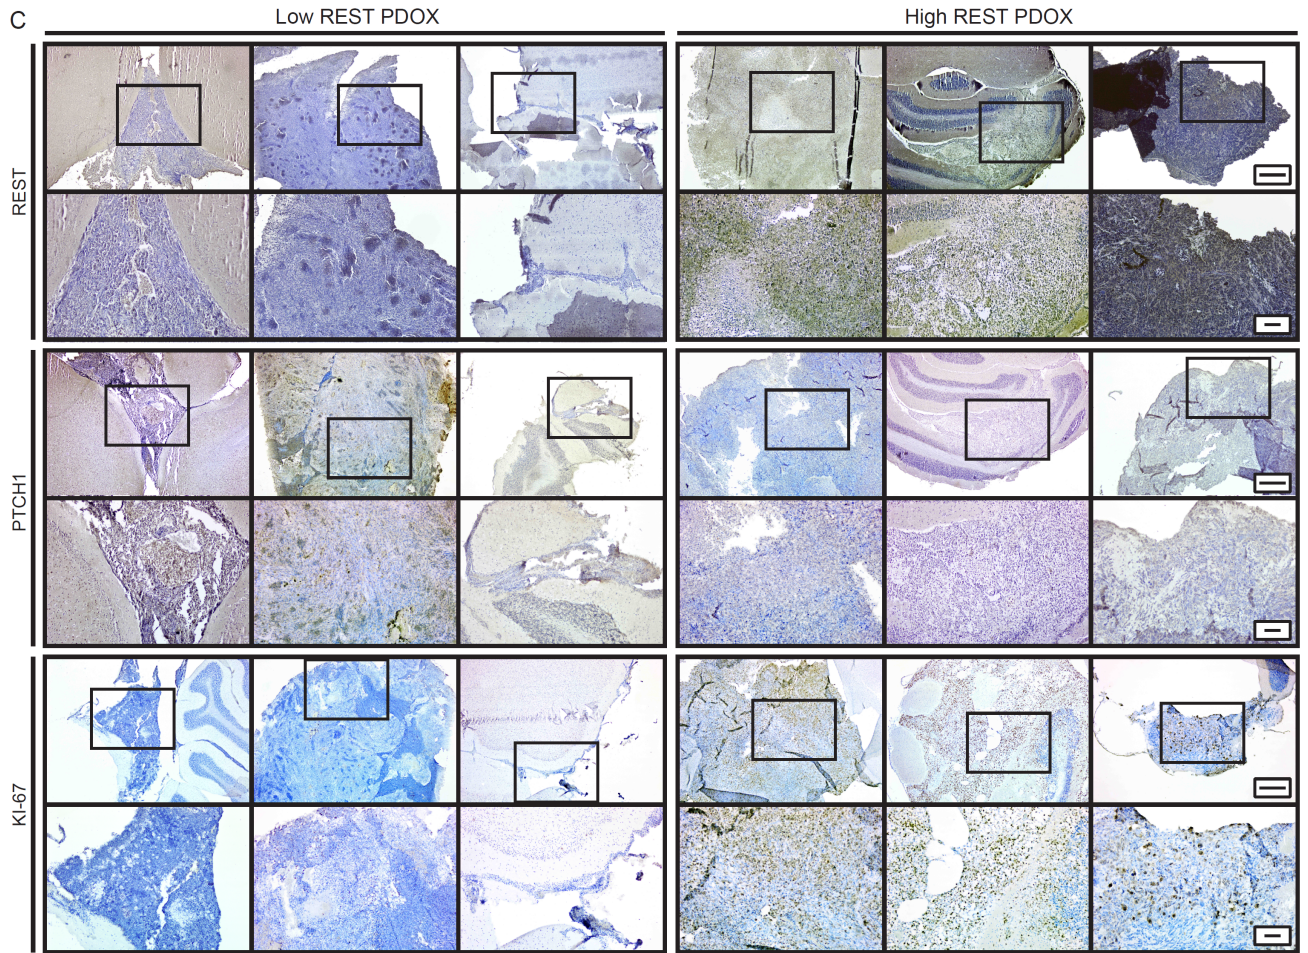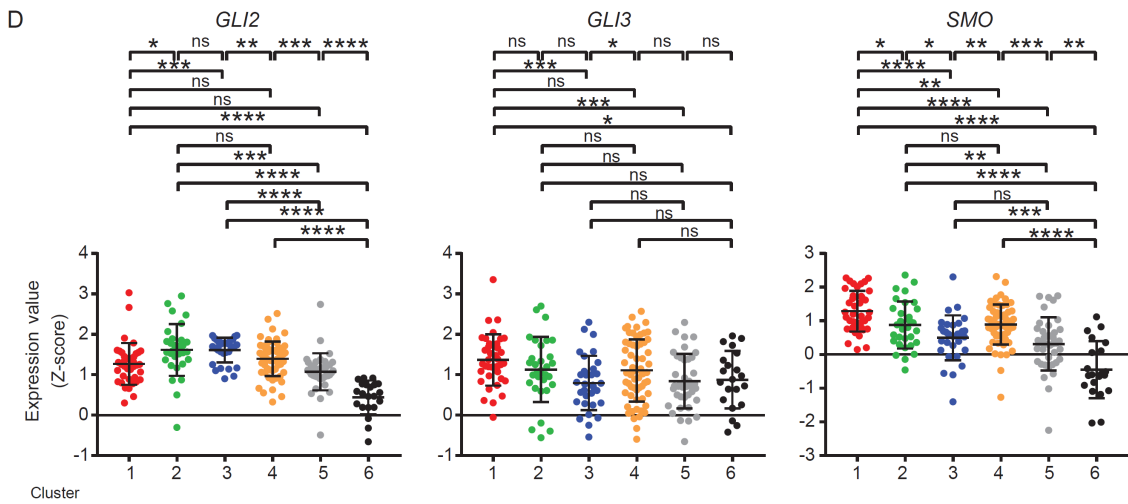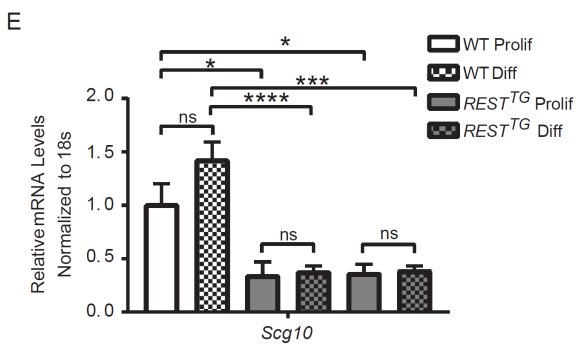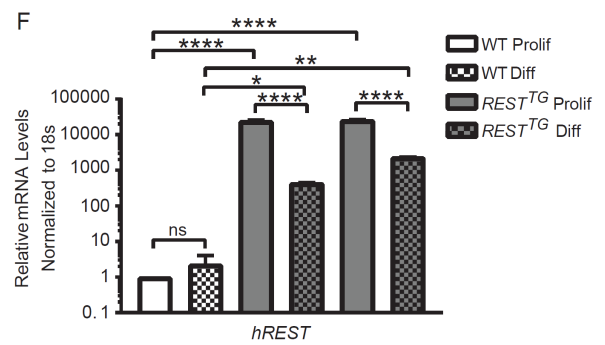



fig S4: Differential regulation of PTCH1 expression by REST in MB tumors and CGNPs. Cerebellar sections of (A) tumor-bearing *Ptch*<sup>+/-</sup> and *Ptch*<sup>+/-</sup>/*REST*<sup>TG</sup> mice (n=3) and (B) DAOY and DAOY-REST xenografts (n=3) and (C) human SHH- subgroup PDOXs (n=3) were analyzed by IHC for REST, PTCH1, and KI-67 expression using specific antibodies. (D) *GLI2*, *GLI3*, and *SMO* mRNA expression profile measured by microarray. The patient samples were divided into six distinct clusters based on clustering assay. Each dot corresponds to one individual patient. (E) *hREST* and (F) *Scg10* mRNA expression was measured in WT and *REST*<sup>TG</sup> GNPs after culturing with proliferation or differentiation media. WT data represents the mean ± SD (of fold change) of triplicate samples (n=3), *REST*<sup>TG</sup> data represents 2 individual pups (n=2). For (A, B, and C) scale bars = 200 μm (top panel - 4X) and 50 μm (bottom panel -10X). For (E and F), p values were calculated by one-tailed t test of dCT values: \*, p<0.05, \*\*, p<0.01, \*\*\*, p<0.001, \*\*\*\*, p<0.0001, ns; non-significant.

Figure S5

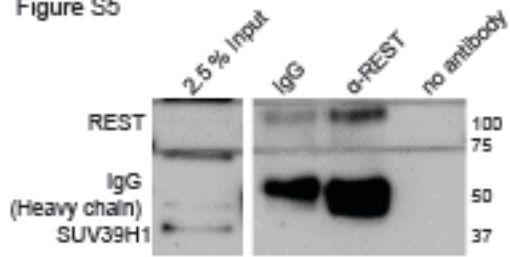

fig S5: REST and SUV39H1 do not co-immunoprecipitate in DAOY cells. Co-IP was performed to determine interaction between REST and SUV39H1. Whole cell extracts from DAOY were immunoprecipitated with IgG (control), REST, or no antibody, run on an SDS-PAGE and probed for REST and SUV39H1 protein. Blot shown is representative of 3 experiments.

Figure S6

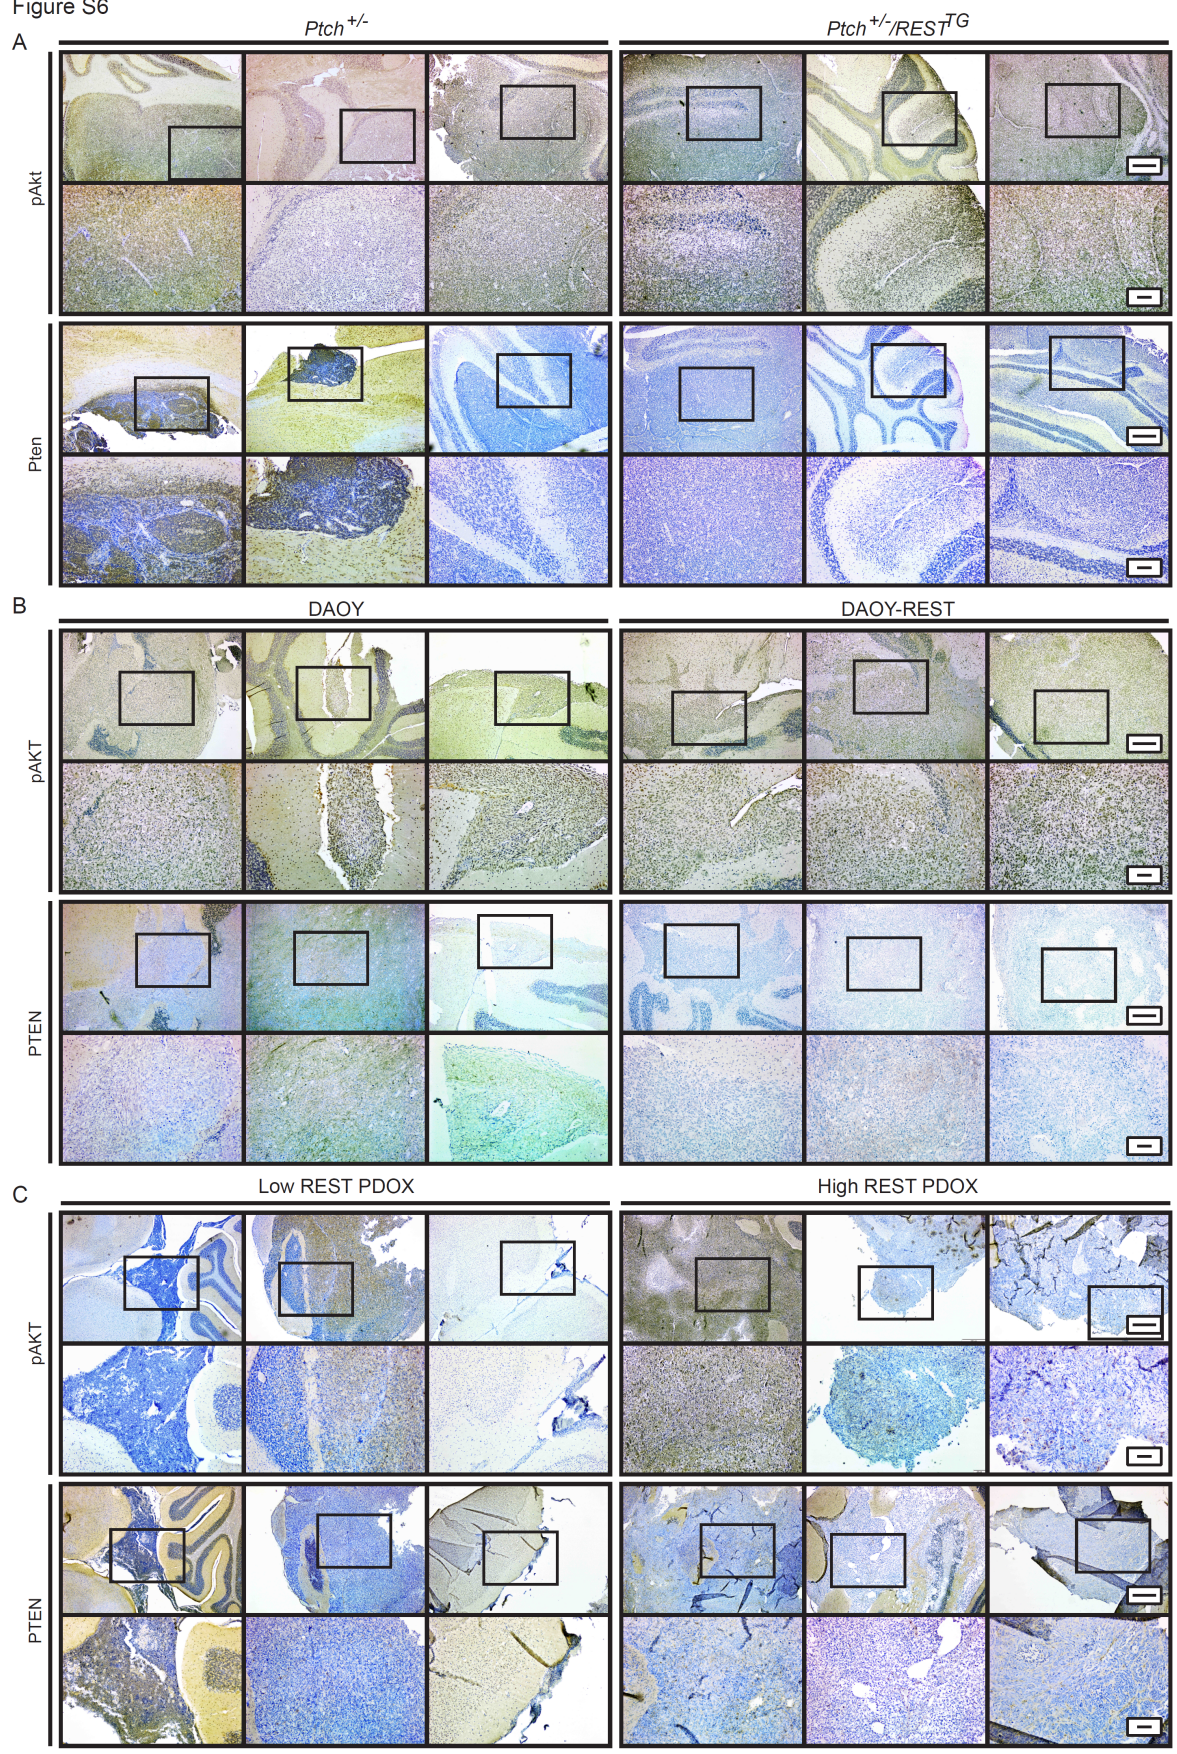

D

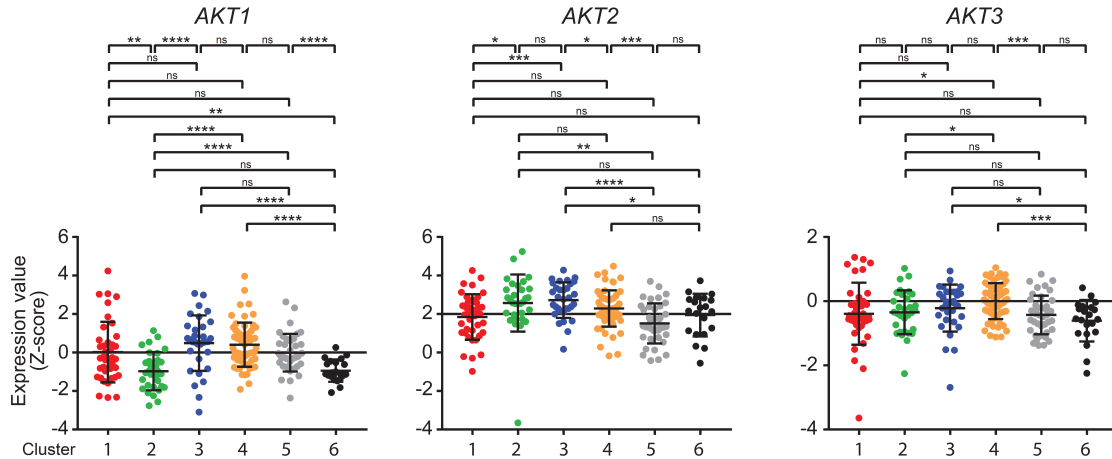

E

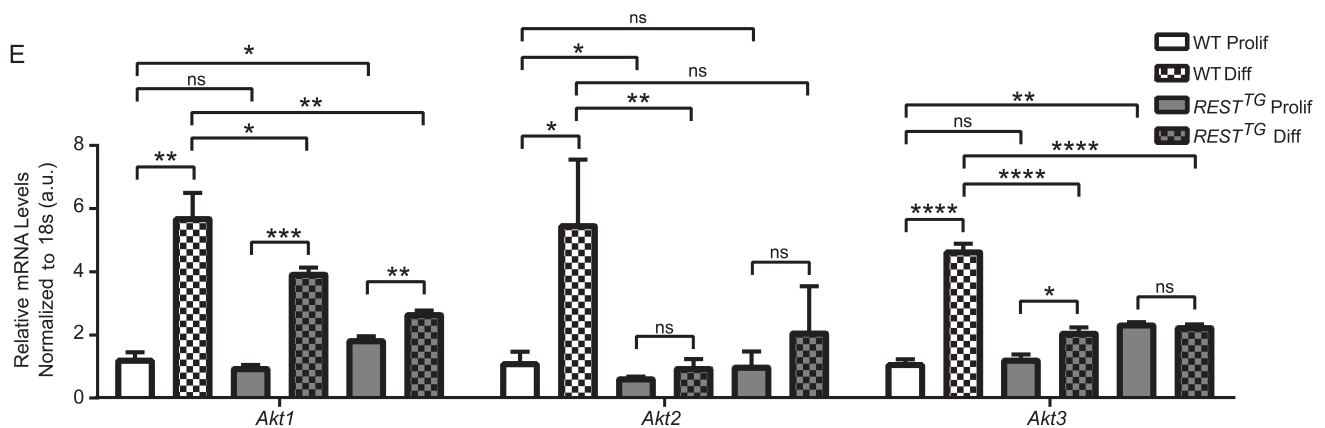

SF6: REST elevation increases AKTSer473 phosphorylation. IHC was performed with specific antibodies targeting p-AKT<sup>S473</sup>, AKT, or PTEN protein in (A) *Ptch<sup>+/-</sup>* and *Ptch<sup>+/-</sup>/*REST<sup>TG</sup>** tumors (n=3), (B) DAOY and DAOY-REST xenografts (n=3) and (C) human SHH- subgroup PDOXs (n=3). (D) *AKT1*, *AKT2*, and *AKT3* mRNA expression profile measured by microarray. The patient samples were divided into six distinct clusters based on clustering assay. Each dot corresponds to one individual patient. (E) *Akt1*, *Akt2*, and *Akt3* mRNA expression was measured in WT and *REST<sup>TG</sup>* GNP cells after culturing with proliferation or differentiation media. WT data represents the mean  $\pm$  SD (of fold change) of triplicate samples (n=3), *REST<sup>TG</sup>* data represents 2 individual pups (n=2). For (A, B, and C) scale bars = 200  $\mu$ m (top panel - 4X) and 50  $\mu$ m (bottom panel -10X). For (E), p values were calculated by one-tailed t test of dCT values: \*, p < 0.05, \*\*, p < 0.01, \*\*\*, p < 0.001, \*\*\*\*, p < 0.0001, ns; non-significant.

Figure S7

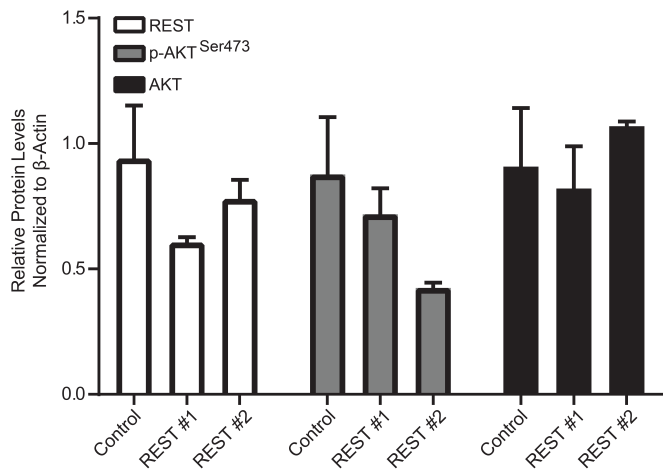

SF7: REST-dependent AKT phosphorylation in cell-lines. (A) Western blot analysis of p-AKT<sup>Ser473</sup> and AKT protein expression following REST knockdown in DAOY cells (Fig. 6 B, right). Densitometry was obtained using Image Lab software (Bio-Rad). Bars represent mean with standard deviations (n=3).

**Tables:**

**Table S1: Synergy between MS275 and UNC0638. Synergy was calculated DAOY and UW228 at 48H post treatment either with each drug alone or in combination.**

| Cell Line | Incubation (hrs) | Drug Conc ( $\mu$ M)<br>MS275 and UNC0638 | Survival (MS275)<br>$\gamma_1$ | Survival (UNC0638)<br>$\gamma_2$ | Predicted survival<br>MS275 + UNC0638<br>$\gamma_1\gamma_2$ | Observed survival<br>MS275 + UNC0638<br>$\gamma_{12}$ |
|-----------|------------------|-------------------------------------------|--------------------------------|----------------------------------|-------------------------------------------------------------|-------------------------------------------------------|
| DAOY      | 48               | 0.625 and 1.0                             | 0.6                            | 0.9                              | 0.54                                                        | 0.34                                                  |
|           |                  | 1.25 and 2.5                              | 0.47                           | 0.79                             | 0.37                                                        | 0.17                                                  |
|           |                  | 2.5 and 5.0                               | 0.25                           | 0.68                             | 0.17                                                        | 0.07                                                  |
| UW228     | 48               | 0.625 and 1.0                             | 0.8                            | 1.0                              | 0.8                                                         | 0.84                                                  |
|           |                  | 1.25 and 2.5                              | 0.87                           | 1.2                              | 1.04                                                        | 0.85                                                  |
|           |                  | 2.5 and 5.0                               | 0.11                           | 1.2                              | 0.132                                                       | 0.11                                                  |

**Synergy:**  $\gamma_1\gamma_2 > \gamma_{12}$

**Antagonism:**  $\gamma_1\gamma_2 < \gamma_{12}$

**Additive:**  $\gamma_1\gamma_2 = \gamma_{12}$

**Table S2: IC50 values for UW228 and DAOY cells treated with MK-2206. Analysis of MTT assays was used to determine IC50 values after UW228 and DAOY cells were treated with MK-2206 at various concentrations as indicated for 24, 48 or 72 hours.**

| Cell lines | Time (Hours) | IC50 of MK-2206 ( $\mu$ M) |
|------------|--------------|----------------------------|
| UW228      | 24           | 7.75                       |
|            | 48           | 3.25                       |
|            | 72           | 0.70                       |
| DAOY       | 24           | 8.50                       |
|            | 48           | 5.00                       |
|            | 72           | 0.95                       |

**Table S3: Antibodies for IHC, qChIP, and Western blotting assays.**

| Antibodies for IHC                | Cat. #     | Company             | Dilution |
|-----------------------------------|------------|---------------------|----------|
| Phospho-AKT (Ser <sup>473</sup> ) | sc-7985-R  | Santa Cruz Biotech. | 1 : 400  |
| PTCH1                             | LS-C176173 | LSBio               | 1 : 400  |
| REST                              | HPA006079  | Sigma-Aldrich       | 1 : 75   |
| KI-67                             | ab15580    | Abcam               | 1 : 100  |

|                 |             |                             |         |
|-----------------|-------------|-----------------------------|---------|
| PTEN            | 9188        | Cell Signaling Technologies | 1 : 100 |
| anti-rabbit-HRP | 111-035-003 | Jackson ImmunoResearch      | 1 : 200 |
| anti-mouse-HRP  | 115-035-003 | Jackson ImmunoResearch      | 1 : 200 |

| <b>Antibodies for qChIP assay</b> | <b>Catalog Number</b> | <b>Company</b>              |
|-----------------------------------|-----------------------|-----------------------------|
| REST                              | 07-579                | Millipore                   |
| REST                              | 17-641                | Millipore                   |
| Gli1                              | ab151796              | Abcam                       |
| Acetyl Histone H3                 | 06-599                | Millipore                   |
| Trimethyl Histone H3 Lys4         | 9751                  | Cell Signaling Technologies |
| Monomethyl Histone H3 Lys9        | 14186                 | Cell Signaling Technologies |
| Dimethyl Histone H3 Lys9          | 4658                  | Cell Signaling Technologies |
| Trimethyl Histone H3 Lys9         | 13969                 | Cell Signaling Technologies |

| <b>Antibody for Western Blot</b>  | <b>Cat. #</b> | <b>Company</b> | <b>Dilution</b> |
|-----------------------------------|---------------|----------------|-----------------|
| REST                              | 07-579        | EMD Millipore  | 1: 800          |
| AKT                               | 9272S         | Cell Signaling | 1: 1000         |
| Phospho-AKT (Ser <sup>473</sup> ) | 9271S         | Cell Signaling | 1: 800          |
| Cleaved caspase-3                 | 9661S         | Cell Signaling | 1: 300          |
| Cleaved PARP                      | 9541S         | Cell Signaling | 1: 500          |
| Histone H3                        | PA5-16183     | Invitrogen     | 1: 4000         |
| $\beta$ -Actin                    | 4967S         | Cell Signaling | 1: 100000       |
| Anti-Rabbit-HRP                   | 7074          | Cell signaling | 1: 5000         |

Table S4: Primers for qChIP and qRT-PCR assays.

| Primers for ChIP-qPCR    | Primer Sequence               |
|--------------------------|-------------------------------|
| Human PTCH RE1-2-Forward | 5'-ATGAGCACACTCTCAGGGAAAC-3'  |
| Human PTCH RE1-2-Reverse | 5'-GTAGTTCAAGACCTCAGTGATCC-3' |
| Human PTCH TSS-Forward   | 5'-GAAATCCAAGCCCAGCGTCC-3'-3' |
| Human PTCH TSS-Reverse   | 5'-TGGCTGCACTCACCATAGCC-3'    |
| Mouse PTCH RE1-Forward   | 5'-AGGAATGTACTACGGCGTGTC-3'   |
| Mouse PTCH RE1-Reverse   | 5'-ATGCGGACGCACAGGTAAC-3'     |
| Mouse PTCH TSS-Forward   | 5'-CAGGGCAGACAAAGAGACCC-3'    |
| Mouse PTCH TSS-Reverse   | 5'-GCTGACCGTGAGGTTCAACA-3'    |

| Primers for qRT-PCR         | Primer Sequence               |
|-----------------------------|-------------------------------|
| Human <i>REST</i> -Forward  | 5'-GGCAGCTGCTGTGATTACCT-3'    |
| Human <i>REST</i> -Reverse  | 5'-AGTTGTTATCCCCAACCGGC-3'    |
| Mouse <i>Scg10</i> -Forward | 5'-TGCGTGCACATCCCTACAAT-3'    |
| Mouse <i>Scg10</i> -Reverse | 5'-TGCTTCACCTCCATGTCGTC-3'    |
| Mouse <i>Syn1</i> -Forward  | 5'-GGACGGAAGGGATCACATTATT-3'  |
| Mouse <i>Syn1</i> Reverse   | 5'-ACCACAAGTTCACGATGAG-3'     |
| Mouse <i>Ptch</i> -Forward  | 5'-GGAAGTTGGTGGACGAGTGAG-3'   |
| Mouse <i>Ptch</i> -Reverse  | 5'-GAGTGCTGAGTCCAGGTGTTG-3'   |
| Mouse <i>Gli1</i> -Forward  | 5'-AGCTGAAGTCAGAGCTGGATATG-3' |



|                            |                                   |
|----------------------------|-----------------------------------|
| Mouse <i>Gli1</i> -Reverse | 5'-CTCATAACACAGACTCAGGCTC-3'      |
| Mouse <i>Akt1</i> -Forward | 5'-TCGTGTGGCAGGATGTGTAT-3'        |
| Mouse <i>Akt1</i> -Reverse | 5'-ACCTGGTGTCAGTCTCAGAGG-3'       |
| Mouse <i>Akt2</i> -Forward | 5'-CAGCTGGGAGACCCAAGA-3'          |
| Mouse <i>Akt2</i> -Reverse | 5'-CACACGCTGTCACCTAGCTT-3'        |
| Mouse <i>Akt3</i> -Forward | 5'-TGGACCACTGTTATAGAGAGAACATTT-3' |
| Mouse <i>Akt3</i> -Reverse | 5'-TGGATAGCTTCCGTCCACTC-3'        |
